# Supplementary material for: Levels of heavy metals in soil and vegetables and associated health risks in Mojo area, Ethiopia
Source: PubMed Central journal article supplement (PMC6992214; doi:10.1371/journal.pone.0227883), 2020-01-30
Supplement: pone.0227883.s001.pdf [file pone.0227883.s001.pdf]

**S1 Table** Optimal conditions achieved for soil and vegetables samples digestion procedures.

| No. | Reagent volumes (mL) |             |             | Temperature(°C) | Pressure (w)  | Time (min) | Result /Observation         |
|-----|----------------------|-------------|-------------|-----------------|---------------|------------|-----------------------------|
|     | HNO <sub>3</sub>     | HCl         | Total       |                 |               |            |                             |
| 1   | 4mL                  | 8mL         | 12mL        | 70-130          | 25-55         | 20         | Deep yellow                 |
| 2   | 5mL                  | 7mL         | 12mL        | 80-140          | 30-60         | 25         | Deep yellow                 |
| 3   | 6mL                  | 6mL         | 12mL        | 90-150          | 35-65         | 30         | Deep yellow                 |
| 4   | 7mL                  | 5mL         | 12mL        | 100-160         | 40-70         | 35         | clear and pale              |
| 5   | 8mL                  | 4mL         | 12mL        | 110-170         | 45-75         | 40         | Clear and pale              |
| 6   | <b>*9mL</b>          | <b>*3mL</b> | <b>12mL</b> | <b>*120-180</b> | <b>*50-80</b> | <b>*45</b> | <b>*Clear and Colorless</b> |
| 7   | 10mL                 | 2mL         | 12mL        | 130-190         | 55-85         | 50         | Clear with suspension       |
| 8   | 11mL                 | 1mL         | 12mL        | 140-200         | 60-90         | 55         | Clear with suspension       |

\*Indicates that the optimal condition for soil, vegetables and water samples digestion procedure.
