# Supplementary material for: Levels of heavy metals in soil and vegetables and associated health risks in Mojo area, Ethiopia
Source: PubMed Central journal article supplement (PMC6992214; doi:10.1371/journal.pone.0227883), 2020-01-30
Supplement: pone.0227883.s002.pdf [file pone.0227883.s002.pdf]

**S2 Table** Instrumental operating condition for the analysis of metal in soil and vegetable samples.

| Parameters          | Value        |
|---------------------|--------------|
| Plasma power        | 1400W        |
| Pump speed          | 30 rpm       |
| Coolant flow        | 13 L/min     |
| Auxiliary flow      | 0.8 L/min    |
| Nebulizer flow      | 0.73 L/min   |
| Optical temperature | 14.0-16.0 °C |
| Nebulizer pressure  | 2.0-4.0 Bar  |
| Main Argon Pressure | 6.0-8.0 Bar  |
| Replicates          | 3            |
