# Supplementary material for: Levels of heavy metals in soil and vegetables and associated health risks in Mojo area, Ethiopia
Source: PubMed Central journal article supplement (PMC6992214; doi:10.1371/journal.pone.0227883), 2020-01-30
Supplement: pone.0227883.s003.pdf [file pone.0227883.s003.pdf]

**S3 Table** Method detection limits (MDL) and limit of quantification (LOQ) for vegetable and soil samples analysis.

| Heavy metals | IDL (mg/L) | Vegetable samples |            | Soil Samples |            |
|--------------|------------|-------------------|------------|--------------|------------|
|              |            | MDL (mg/L)        | LOQ (mg/L) | MDL (mg/L)   | LOQ (mg/L) |
| As           | 0.0001     | 0.0011            | 0.084      | 0.0016       | 0.185      |
| Pb           | 0.0004     | 0.0007            | 0.057      | 0.0006       | 0.034      |
| Cd           | 0.0003     | 0.0005            | 0.063      | 0.0008       | 0.035      |
| Zn           | 0.0004     | 0.0007            | 0.084      | 0.0012       | 0.746      |
| Cu           | 0.0006     | 0.0013            | 0.047      | 0.0015       | 0.043      |
| Fe           | 0.0001     | 0.0004            | 0.036      | 0.0008       | 0.066      |
| Mn           | 0.0001     | 0.0002            | 0.069      | 0.0004       | 0.070      |
| Cr           | 0.0007     | 0.0014            | 0.033      | 0.0016       | 0.032      |
| Hg           | 0.0006     | 0.0015            | 0.023      | 0.0017       | 0.021      |
| Ni           | 0.0004     | 0.0011            | 0.018      | 0.0015       | 0.016      |
| Co           | 0.0002     | 0.0013            | 0.024      | 0.0019       | 0.011      |
