# Supplementary material for: Levels of heavy metals in soil and vegetables and associated health risks in Mojo area, Ethiopia
Source: PubMed Central journal article supplement (PMC6992214; doi:10.1371/journal.pone.0227883), 2020-01-30
Supplement: pone.0227883.s004.pdf [file pone.0227883.s004.pdf]

**S4 Table** Percentage recovery data of the method used for soil sample digestion (M±SD, n = 3)

| Heavy Metal | Concentration before spiking (M± SDs) (mg/kg) | Amount spiked (mg/kg) | Concentration after spiking (M± SD) (mg/kg) | % Recovery | % RSD |
|-------------|-----------------------------------------------|-----------------------|---------------------------------------------|------------|-------|
| Cr          | 0.414±0.01                                    | 5                     | 6.04±0.014                                  | 112.52     | 2.42  |
| Cd          | 0.06±0.012                                    | 5                     | 5.86±0.013                                  | 116.00     | 20.0  |
| Zn          | 1.069±0.035                                   | 5                     | 6.55±0.015                                  | 109.62     | 3.27  |
| Fe          | 0.453±0.053                                   | 5                     | 6.04±0.023                                  | 111.74     | 11.69 |
| Pb          | 0.430±0.021                                   | 5                     | 5.93±0.227                                  | 110.00     | 4.88  |
| Cu          | 0.263±0.001                                   | 5                     | 5.76±0.011                                  | 109.94     | 0.38  |
| As          | 0.324 ±0.059                                  | 5                     | 5.92±0.233                                  | 111.92     | 8.21  |
| Mn          | 0.177±0.005                                   | 5                     | 5.65±0.006                                  | 109.46     | 8.48  |
| Hg          | 0.165±0.008                                   | 5                     | 5.26±0.017                                  | 101.9      | 4.84  |
| Ni          | 0.35±0.008                                    | 5                     | 5.47±0.014                                  | 109.4      | 2.28  |
| Co          | 0.136±0.027                                   | 5                     | 5.76±0.014                                  | 112.08     | 9.85  |
