# Supplementary material for: Levels of heavy metals in soil and vegetables and associated health risks in Mojo area, Ethiopia
Source: PubMed Central journal article supplement (PMC6992214; doi:10.1371/journal.pone.0227883), 2020-01-30
Supplement: pone.0227883.s005.pdf [file pone.0227883.s005.pdf]

**S5 Table** Percentage recovery values of the method used for tomato digestion (M±SD, n = 3)

| Heavy Metal | Concentration before spiking (M± SD) (ppm) | Amount spiked (ppm) | Concentration after spiking (M± SD) (ppm) | % Recovery | % RSD |
|-------------|--------------------------------------------|---------------------|-------------------------------------------|------------|-------|
| Cr          | 0.12 ± 0.013                               | 5                   | 5.78±0.018                                | 113.20     | 10.83 |
| Cd          | 0.124±0.004                                | 5                   | 5.85±0.026                                | 114.52     | 3.22  |
| Zn          | 0.222±0.007                                | 5                   | 5.87±0.02                                 | 112.96     | 3.15  |
| Fe          | 0.432±0.002                                | 5                   | 6.23±0.022                                | 115.96     | 0.46  |
| Pb          | 0.024±0.004                                | 5                   | 5.68±0.151                                | 113.12     | 6.66  |
| Cu          | 0.134±0.006                                | 5                   | 5.54±0.015                                | 108.12     | 4.48  |
| As          | 0.008± 0.001                               | 5                   | 5.8±0.132                                 | 115.84     | 8.50  |
| Mn          | 0.277±0.004                                | 5                   | 6.15±0.004                                | 117.46     | 1.44  |
| Hg          | 0.032±0.001                                | 5                   | 5.33±0.001                                | 105.96     | 3.12  |
| Ni          | 0.009±0.001                                | 5                   | 5.28±0.021                                | 105.42     | 11.11 |
| Co          | 0.004±0.0001                               | 5                   | 5.23±0.016                                | 104.52     | 2.5   |
