# Supplementary material for: Levels of heavy metals in soil and vegetables and associated health risks in Mojo area, Ethiopia
Source: PubMed Central journal article supplement (PMC6992214; doi:10.1371/journal.pone.0227883), 2020-01-30
Supplement: pone.0227883.s006.pdf [file pone.0227883.s006.pdf]

**S6 Table** Percentage recovery values of the method used for cabbage digestion (M±SD, n = 3)

| Heavy Metal | Concentration before spiking (M± SD) (ppm) | Amount spiked (ppm) | Concentration after spiking (M± SD) (ppm) | % Recovery | % RSD |
|-------------|--------------------------------------------|---------------------|-------------------------------------------|------------|-------|
| Cr          | 0.390±0.03                                 | 5                   | 5.10±0.02                                 | 94.20      | 7.69  |
| Cd          | 0.230±0.004                                | 5                   | 5.40±0.01                                 | 103.40     | 1.74  |
| Zn          | 0.354±0.01                                 | 5                   | 5.73±0.02                                 | 107.52     | 2.82  |
| Fe          | 0.330±0.06                                 | 5                   | 5.03±0.17                                 | 94.00      | 8.18  |
| Pb          | 0.262± 0.05                                | 5                   | 5.45±0.21                                 | 103.76     | 9.08  |
| Cu          | 0.072±0.01                                 | 5                   | 5.07±0.02                                 | 99.96      | 10.88 |
| As          | 0.059±0.01                                 | 5                   | 5.36±0.20                                 | 106.02     | 6.95  |
| Mn          | 0.076±0.01                                 | 5                   | 5.18±0.02                                 | 102.08     | 10.16 |
| Hg          | 0.042±0.003                                | 5                   | 5.21±0.01                                 | 103.36     | 7.14  |
| Ni          | 0.027±0.004                                | 5                   | 5.4±0.019                                 | 107.46     | 9.81  |
| Co          | 0.0136±0.001                               | 5                   | 5.56±0.019                                | 110.94     | 7.35  |
